# Supplementary material for: Anisotropic silica coating on gold nanorods boosts their potential as SERS sensors
Source: Royal Society of Chemistry journal article supplement (doi:10.1039/d1nr07918b), 2022-01-01
Supplement: d1nr07918b1.pdf [file d1nr07918b1.pdf]

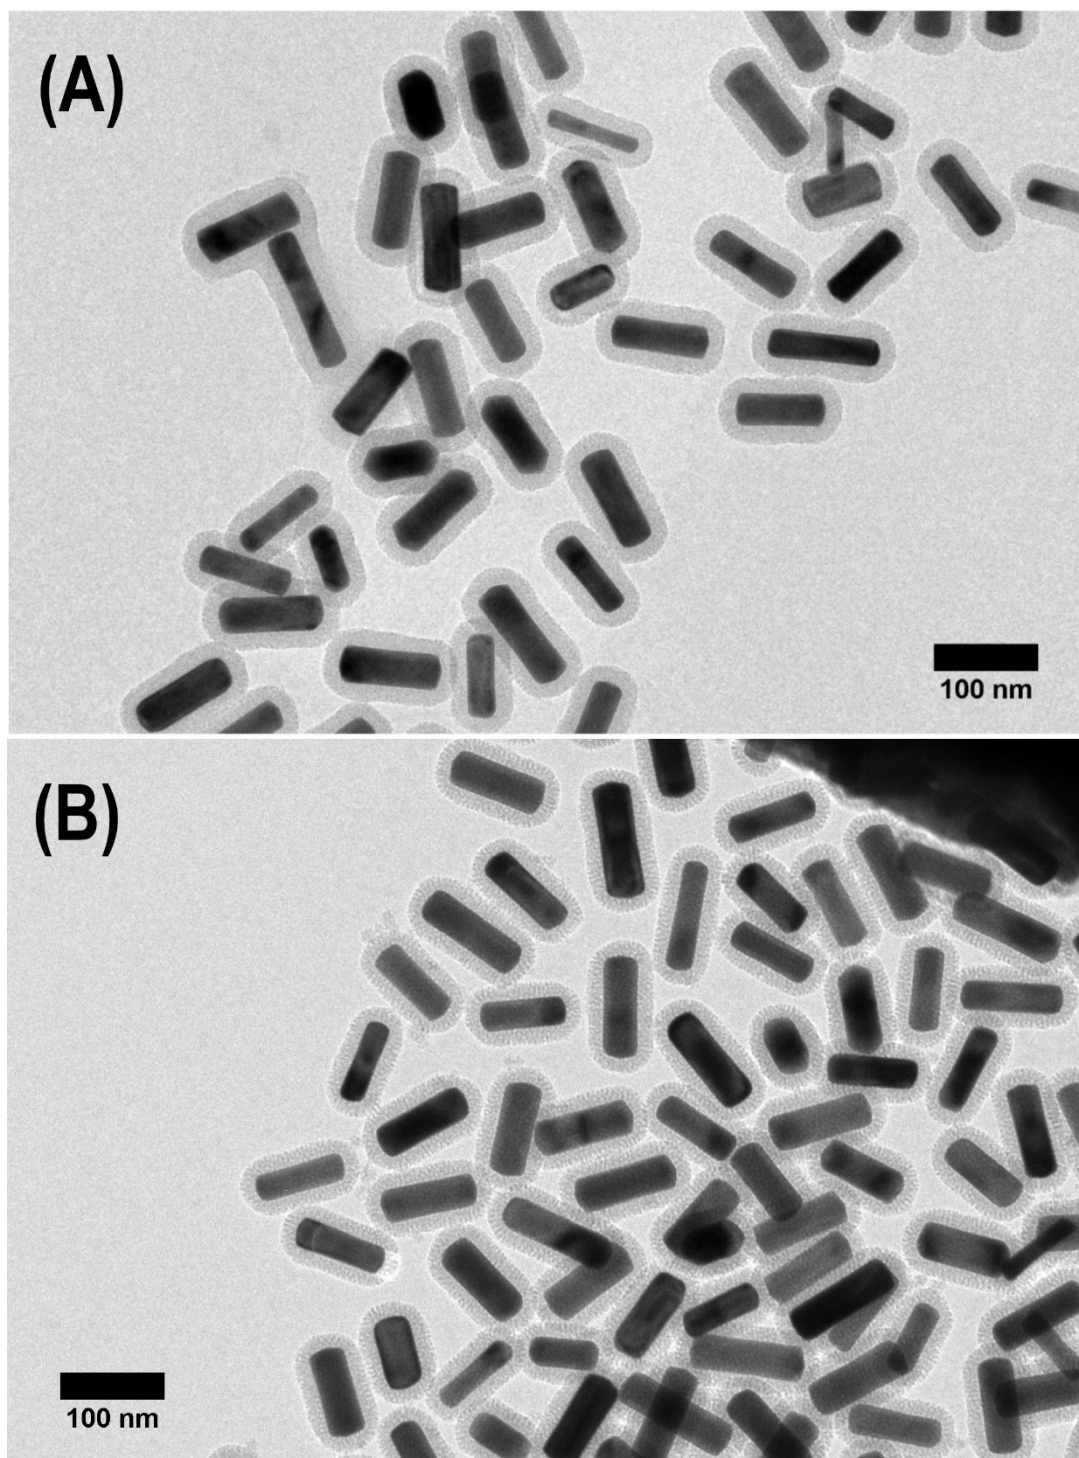

**Supporting Information Section 1: TEM comparison of large vs. small pore silica**

*Figure S1:* TEM micrographs of the (A) small pore and (B) large pore silica coated AuNRs
